# Supplementary material for: Broadband short-wave near-infrared-emitting phosphor MgNb2O6:Cr3+ for pc-LED applications
Source: Royal Society of Chemistry journal article supplement (doi:10.1039/d3dt03896c), 2024-01-01
Supplement: d3dt03896c1.pdf [file d3dt03896c1.pdf]

## Supporting Information

# Broadband short-wave near-infrared-emitting phosphor

## MgNb<sub>2</sub>O<sub>6</sub>:Cr<sup>3+</sup> for *pc*-LED applications

Dechao Yu,<sup>1,2,4</sup> Qingyang Ding,<sup>1</sup> Tiantian Shen,<sup>1</sup> Liang Qiu,<sup>3</sup> Fanquan He,<sup>4</sup> Xinxin Han,<sup>2</sup> Enhai Song,<sup>4</sup>

Songlin Zhuang,<sup>1</sup> and Dawei Zhang<sup>1,\*</sup>

<sup>1</sup>*Engineering Research Center of Optical Instrument and System, Ministry of Education and Shanghai Key Lab of Modern Optical System, University of Shanghai for Science and Technology, Shanghai 200093, PR China*

<sup>2</sup>*MOE Key Laboratory of New Processing Technology for Non-ferrous Metals and Materials, Guangxi Key Laboratory of Processing for Non-ferrous Metals and Featured Materials, Guangxi University, Nanning, Guangxi 530004, PR China*

<sup>3</sup>*Hechi College, Hechi 546300, PR China*

<sup>4</sup>*State Key Laboratory of Luminescent Materials and Devices, School of Materials Science and Engineering, South China University of Technology, Guangzhou 510641, PR China*

**\*Corresponding author:**

Dawei Zhang. Email: [dwzhang@usst.edu.cn](mailto:dwzhang@usst.edu.cn)

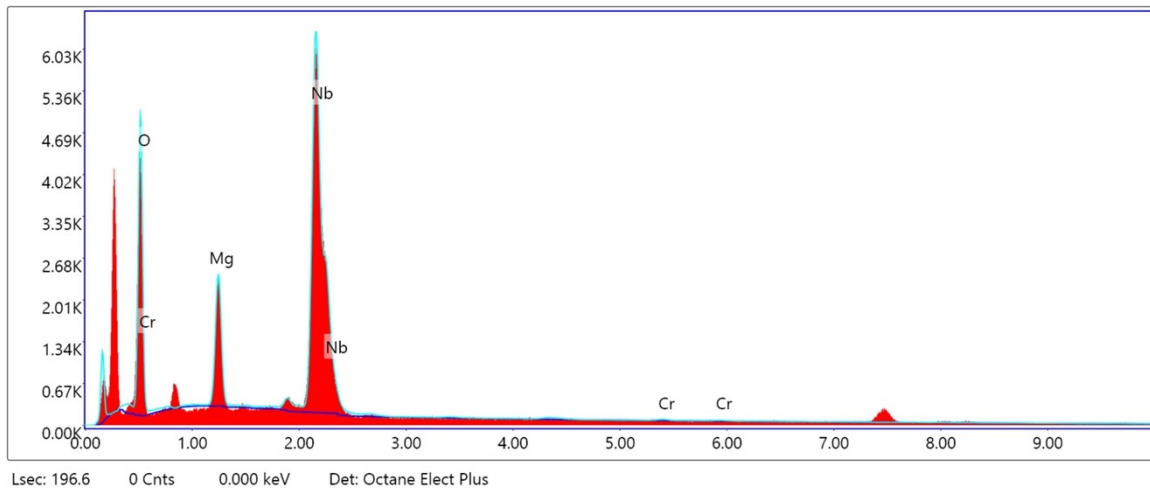

**Figure S1** The EDS analysis spectra of the  $\text{MgNb}_2\text{O}_6:1\%\text{Cr}^{3+}$  phosphor

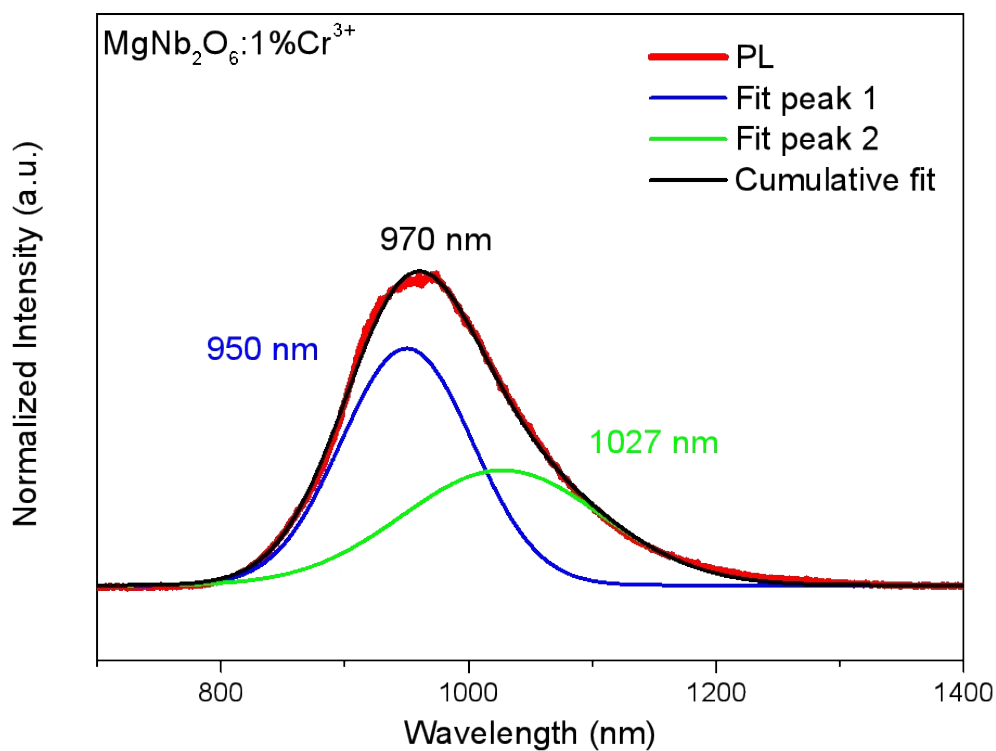

**Figure S2** A Gaussian fitting for the PL spectrum of the  $\text{MgNb}_2\text{O}_6:1\%\text{Cr}^{3+}$  phosphor

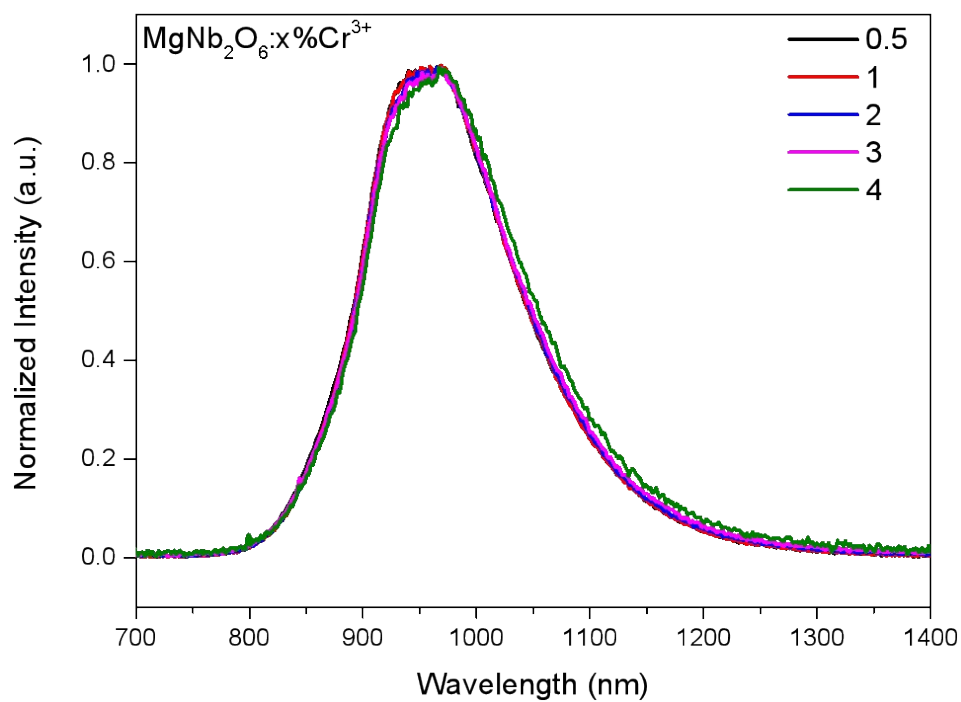

**Figure S3** Normalized PL spectra of the  $\text{MgNb}_2\text{O}_6:x\%\text{Cr}^{3+}$  ( $x = 0.5, 1, 2, 3, 4$ ) samples under excitation of 515 nm.

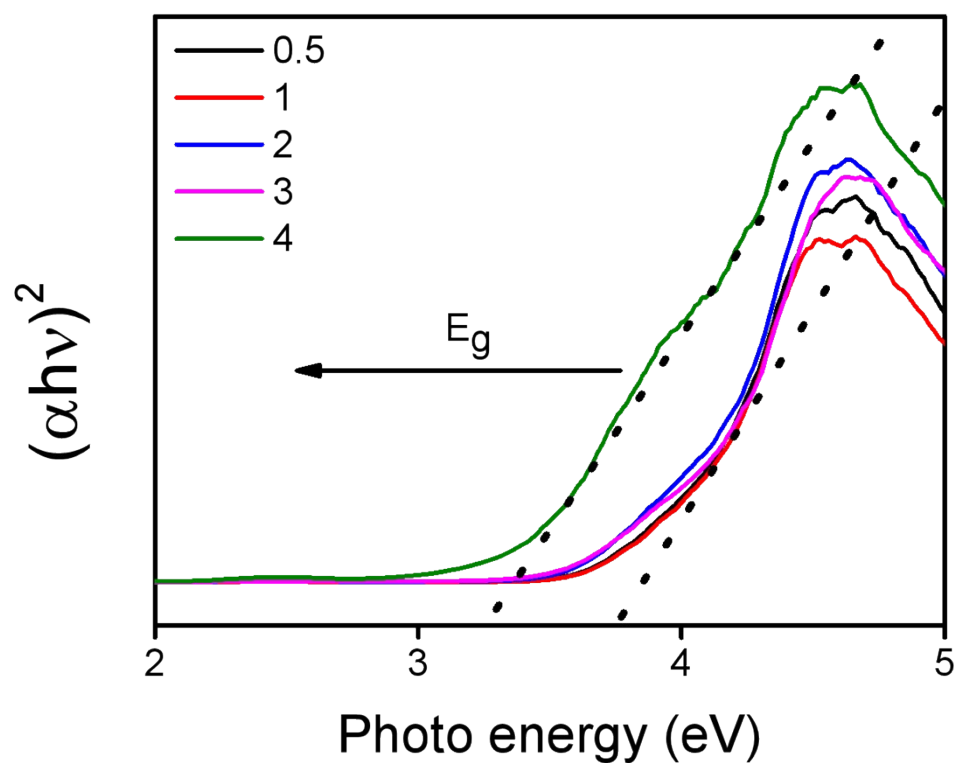

**Figure S4** The calculated bandgap ( $E_g$ ) of the  $\text{MgNb}_2\text{O}_6:x\%\text{Cr}^{3+}$  ( $x = 0.5, 1, 2, 3, 4$ ) phosphor samples.

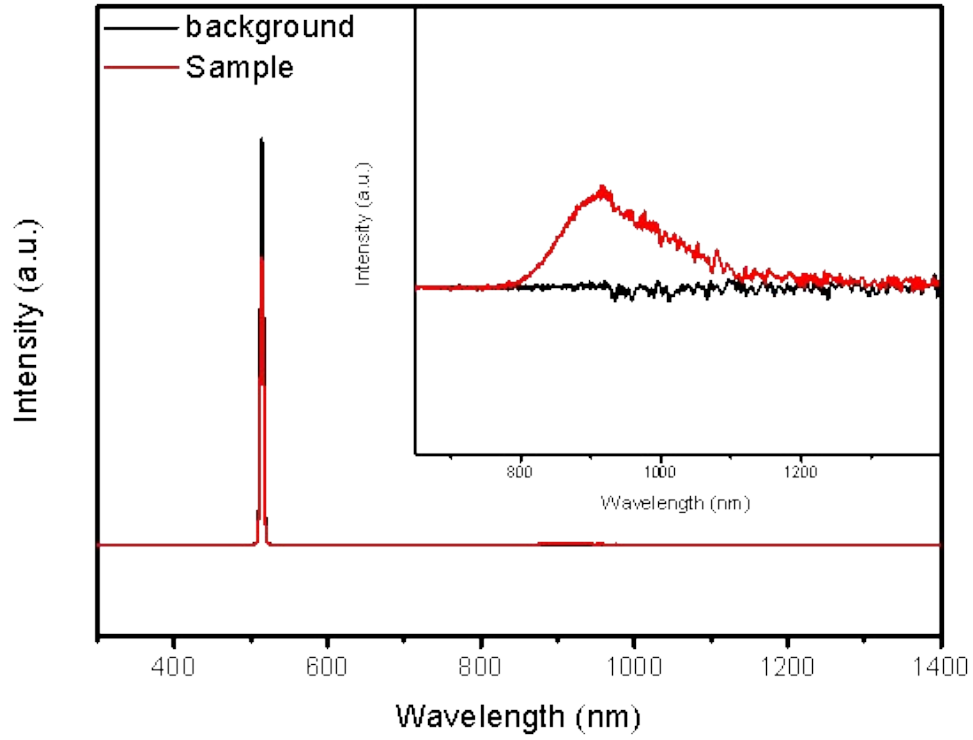

**Figure S5** The measured spectra for determining the photoluminescence quantum yield of the  $\text{MgNb}_2\text{O}_6:1\%\text{Cr}^{3+}$  sample.

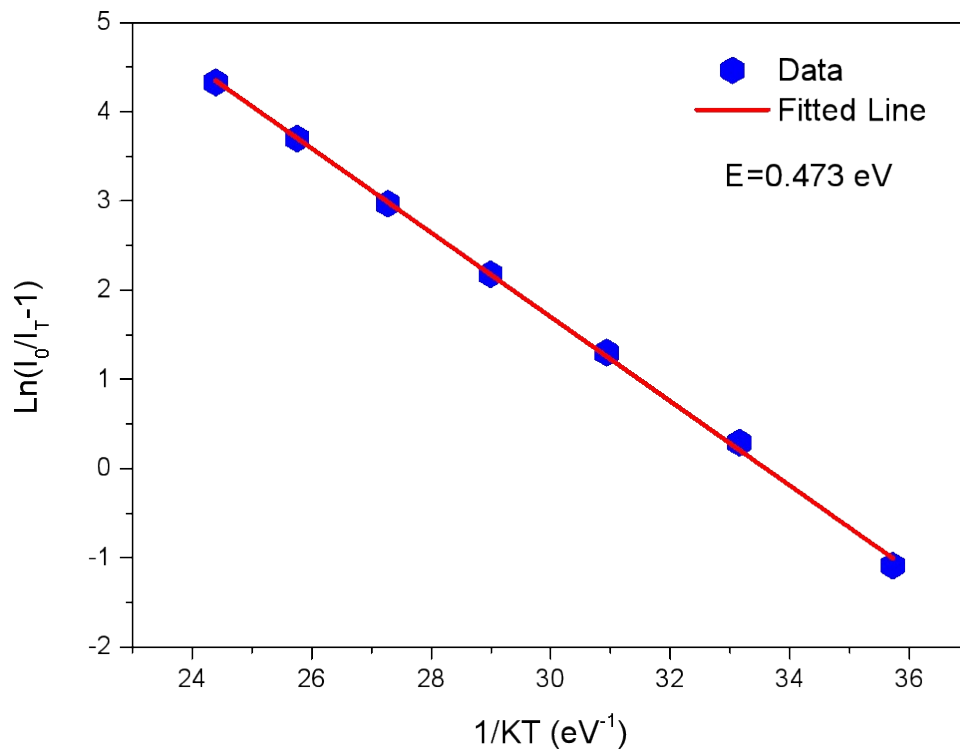

**Figure S6**  $\ln(I_0/I_T - 1)$  versus  $1/KT$  plot of the temperature dependent spectra ( $I_0 = I_{298\text{K}}$ )

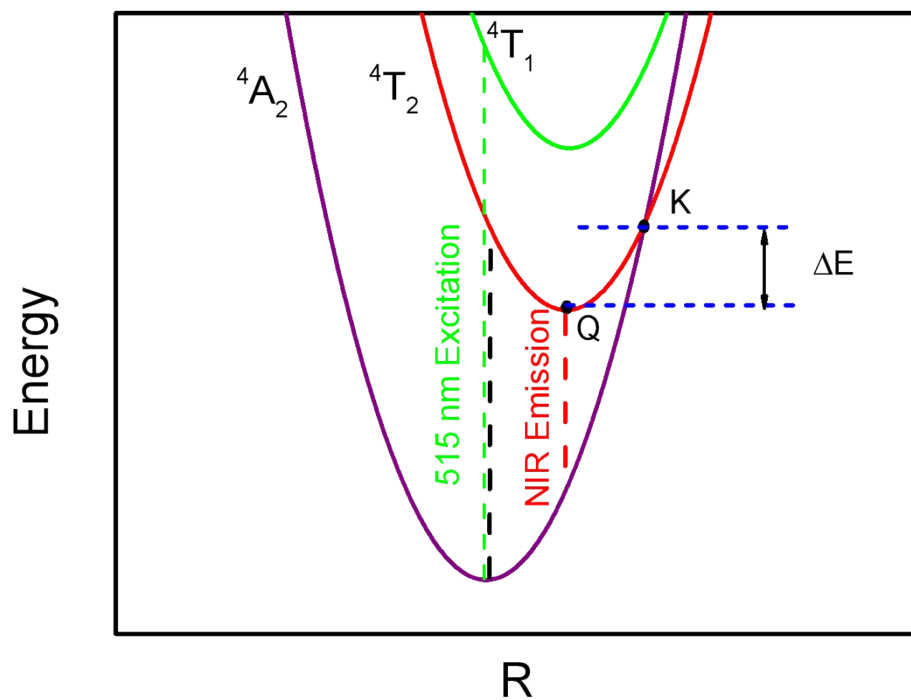

**Figure S7** Configurational coordinate diagram of thermal quenching behavior for the  $\text{MgNb}_2\text{O}_6:1\%\text{Cr}^{3+}$  optimal sample

**Table S1** The crystal parameters of the MgNb<sub>2</sub>O<sub>6</sub> host

| Compound     | MgNb <sub>2</sub> O <sub>6</sub> | Bond  | value   |
|--------------|----------------------------------|-------|---------|
| Space group  | P b c n (60)                     | Mg-O1 | 2.081 Å |
| a            | 14.1875 Å                        | Mg-O2 | 2.081 Å |
| b            | 5.7001 Å                         | Mg-O3 | 2.082 Å |
| c            | 5.0331 Å                         | Mg-O4 | 2.082 Å |
| a/b          | 2.4890                           | Mg-O5 | 2.132 Å |
| b/c          | 1.1325                           | Mg-O6 | 2.132 Å |
| c/a          | 0.3548                           | Nb-O1 | 2.080 Å |
| V            | 407.03(1) Å <sup>3</sup>         | Nb-O2 | 1.910 Å |
| Z            | 4                                | Nb-O3 | 1.795 Å |
|              |                                  | Nb-O4 | 2.071 Å |
| Average Mg-O | Average Nb-O                     | Nb-O5 | 1.960 Å |
| 2.065 Å      | 2.014 Å                          | Nb-O6 | 2.272 Å |

**Table S2** Calculated crystal lattice parameters of the as-prepared MgNb<sub>2</sub>O<sub>6</sub>:x%Cr<sup>3+</sup> (x = 0, 0.5, 1, 2, 3, 4) phosphor samples

| Samples | a         | b        | c        | V                      |
|---------|-----------|----------|----------|------------------------|
| x = 0   | 14.1875 Å | 5.7001 Å | 5.0331 Å | 407.030 Å <sup>3</sup> |
| x = 0.5 | 14.1875 Å | 5.6989 Å | 5.0338 Å | 407.012 Å <sup>3</sup> |
| x = 1   | 14.1891 Å | 5.6995 Å | 5.0325 Å | 406.994 Å <sup>3</sup> |
| x = 2   | 14.1858 Å | 5.7001 Å | 5.0332 Å | 406.991 Å <sup>3</sup> |
| x = 3   | 14.1892 Å | 5.6995 Å | 5.0325 Å | 406.719 Å <sup>3</sup> |
| x = 4   | 14.1839 Å | 5.6984 Å | 5.0314 Å | 406.668 Å <sup>3</sup> |

**Table S3** Results of EDS mapping of the MgNb<sub>2</sub>O<sub>6</sub>:1%Cr<sup>3+</sup> representative

| Element | Weight % | Atomic % | Net Int. | Error % | K ratio | Z      | A      | F      |
|---------|----------|----------|----------|---------|---------|--------|--------|--------|
| Mg      | 7.66     | 12.33    | 148.60   | 4.56    | 0.0620  | 1.0408 | 0.7726 | 1.0066 |
| Nb      | 67.87    | 28.58    | 545.20   | 2.08    | 0.5469  | 0.7833 | 1.0290 | 0.9997 |
| O       | 24.03    | 58.75    | 238.30   | 8.29    | 0.0982  | 1.1200 | 0.3648 | 1.0000 |
| Cr      | 0.44     | 0.33     | 2.20     | 59.15   | 0.0040  | 0.9055 | 0.9764 | 1.0244 |

**Table S4** Fitting functions, R-square, and calculated decay time of the MgNb<sub>2</sub>O<sub>6</sub>:x%Cr<sup>3+</sup> (x = 0.5, 1, 2, 3, 4) monitoring at 970 nm under pulsed light excitation of 515 nm

| Sample                                                 | fitting function                                          | $\tau_1$ ( $\mu$ s) | $\tau_2$ ( $\mu$ s) | $\tau_{avg}$ ( $\mu$ s) | R-square |
|--------------------------------------------------------|-----------------------------------------------------------|---------------------|---------------------|-------------------------|----------|
| MgNb <sub>2</sub> O <sub>6</sub> :0.5%Cr <sup>3+</sup> | $I = A_1 * \exp(-t/\tau_1) + A_2 * \exp(-t/\tau_2) + I_0$ | 10.29               | 10.29               | 10.29                   | 0.99898  |
| MgNb <sub>2</sub> O <sub>6</sub> :1%Cr <sup>3+</sup>   | $I = A_1 * \exp(-t/\tau_1) + A_2 * \exp(-t/\tau_2) + I_0$ | 10.20               | 10.20               | 10.20                   | 0.99911  |
| MgNb <sub>2</sub> O <sub>6</sub> :2%Cr <sup>3+</sup>   | $I = A_1 * \exp(-t/\tau_1) + A_2 * \exp(-t/\tau_2) + I_0$ | 9.43                | 9.43                | 9.43                    | 0.99917  |
| MgNb <sub>2</sub> O <sub>6</sub> :3%Cr <sup>3+</sup>   | $I = A_1 * \exp(-t/\tau_1) + A_2 * \exp(-t/\tau_2) + I_0$ | 7.13                | 13.5                | 8.19                    | 0.9993   |
| MgNb <sub>2</sub> O <sub>6</sub> :4%Cr <sup>3+</sup>   | $I = A_1 * \exp(-t/\tau_1) + A_2 * \exp(-t/\tau_2) + I_0$ | 11.00               | 3.91                | 5.09                    | 0.99905  |

**Table S5** The NIR output power and photoelectric efficiency of MgNb<sub>2</sub>O<sub>6</sub>:1%Cr<sup>3+</sup> pc-LED and that of some reported similar pc-LED devices

| Phosphors                                                                                | Chip (nm) | Peak (nm) | NIR output power   | Photoelectric efficiency | Ref          |
|------------------------------------------------------------------------------------------|-----------|-----------|--------------------|--------------------------|--------------|
| NaInGe <sub>2</sub> O <sub>6</sub> :7%Cr <sup>3+</sup>                                   | 470       | 900       | 25.2 mW@<br>120 mA | 8.2%@20<br>mA            | S1           |
| Mg <sub>3</sub> Ga <sub>1.9</sub> In <sub>0.1</sub> GeO <sub>8</sub> :3%Cr <sup>3+</sup> | 455       | 910       | 6.134 mW@<br>60 mA | 8.5%@60<br>mA            | S2           |
| ZnTa <sub>2</sub> O <sub>6</sub> :4%Cr <sup>3+</sup>                                     | 460       | 935       | 39.8 mW@<br>300 mA | 5%@100<br>mA             | S3           |
| Li <sub>3</sub> Sc <sub>2</sub> (PO <sub>4</sub> ) <sub>3</sub> :8%Cr <sup>3+</sup>      | 496       | 978       | 5.81 mW@<br>80mA   | 2.62%@80<br>mA           | S4           |
| MgNb <sub>2</sub> O <sub>6</sub> :1%Cr <sup>3+</sup>                                     | 515       | 970       | 6.29 mW@<br>100mA  | 2.5%@100<br>mA           | This<br>work |

## Reference

- S1. W. Zhou, J. Luo, J. Fan, H. Pan, S. Zeng, L. Zhou, Q. Pang and X. Zhang, *Ceram. Int.*, 2021, **47**, 25343-25349.
- S2. D. Dai, Z. Wang, Z. Xing, X. Li, C. Liu, L. Zhang, Z. Yang and P. Li, *J. Alloys Compd.*, 2019, **806**, 926-938.
- S3. S. He, P. Li, Y. Ren, G. Wei, Y. Wang, Y. Yang, R. Li, J. Li, Y. Shi, X. Shi and Z. Wang, *Inorg. Chem.*, 2022, **61**, 11284-11292.
- S4. S. Zhao, L. Lou, S. Yuan, D. Zhu, F. Wu and Z. Mu, *J. Lumin.*, 2022, **251**, 119188.
